# Supplementary material for: Effects of Different N Fertilizer Doses on Phenology, Photosynthetic Fluorescence, and Yield of Quinoa
Source: MDPI journal article supplement (doi:10.3390/agronomy14050914), 2024-04-26
Supplement: s1 [file s1]

**Table S1** Analysis of variance (F-values) from growth and photosynthetic traits of quinoa at different stages and N levels and yield traits at different N levels

| Source   | Plant height       |           | Stem diameter |          | SPAD        |          | <i>Pn</i> |          |
|----------|--------------------|-----------|---------------|----------|-------------|----------|-----------|----------|
|          | 2020               | 2021      | 2020          | 2021     | 2020        | 2021     | 2020      | 2021     |
| Stage    | 1028.1***          | 3666.6*** | 238.4***      | 220.5*** | 148.4***    | 366.7*** | 152.5***  | 422.0*** |
| Nitrogen | 3.58*              | 18.5***   | 2.18ns        | 2.10ns   | 4.94**      | 13.72*** | 5.87**    | 8.35***  |
| S x N    | 0.10ns             | 0.82ns    | 0.13ns        | 0.32ns   | 1.93ns      | 5.91***  | 0.77ns    | 2.08ns   |
| Source   | <i>E</i>           |           | <i>Ci</i>     |          | <i>gs</i>   |          |           |          |
|          | 2020               | 2021      | 2020          | 2021     | 2020        | 2021     | 2020      | 2021     |
| Stage    | 182.7***           | 492.6***  | 76.3***       | 135.4*** | 210.1***    |          |           | 809.1*** |
| Nitrogen | 3.05*              | 9.73***   | 10.26***      | 19.62*** | 2.51ns      |          |           | 7.85***  |
| S x N    | 0.26ns             | 1.05ns    | 0.30ns        | 0.70ns   | 0.16ns      |          |           | 0.84ns   |
| Source   | Number of branches |           | Grain weight  |          | Grain yield |          |           |          |
|          | 2020               | 2021      | 2020          | 2021     | 2020        | 2021     | 2020      | 2021     |
| Nitrogen | 0.85ns             | 0.84ns    | 5.67*         | 5.18*    | 7.74**      |          |           | 11.2**   |

\*, \*\*, \*\*\* showed significance at 0.05, 0.01, and 0.001 probability from analysis of variance.
